# Supplementary material for: Trace Element Composition of Molybdenite: Deposit Type Discrimination and Limitations
Source: MDPI journal article supplement (doi:10.3390/min13010114), 2023-01-11
Supplement: s1 [file s1]

## Supplementary tables

**Table S1.** Summary of basic information on molybdenite samples from different deposit types.

| Deposit name          | Deposit type             | Country           | Number of analyses | Reference |
|-----------------------|--------------------------|-------------------|--------------------|-----------|
| Hilltop               | Porphyry Mo-Cu-Au        | the United States | 91                 | [20]      |
| Boddington            | Porphyry Cu-Au-Mo        | Western Australia | 66                 | [20]      |
| Krupka                | Quartz vein Sn-W         | Czech Republic    | 33                 | [21]      |
| Cínovec               | Quartz vein Sn-W-Li      | Czech Republic    | 10                 | [21]      |
| Sadisdorf             | Greisen Sn-W             | Czech Republic    | 5                  | [21]      |
| Krásno-Hubr           | Greisen Sn-W             | Czech Republic    | 6                  | [21]      |
| Jáchymov              | Greisen Sn-W             | Czech Republic    | 5                  | [21]      |
| Čelina                | Quartz vein Au           | Czech Republic    | 8                  | [21]      |
| Mokrsko               | Quartz vein Au           | Czech Republic    | 12                 | [21]      |
| Kasejovice            | Quartz vein Au-W         | Czech Republic    | 7                  | [21]      |
| Vidly                 | Quartz vein Mo-Au        | Czech Republic    | 12                 | [21]      |
| Obří důl              | Skarn Fe-Cu-As           | Czech Republic    | 7                  | [21]      |
| Staré Ransko Obrázek  | Volcanogenic Zn-Cu-Ba-Pb | Czech Republic    | 5                  | [21]      |
| Kalmakyr              | Porphyry Cu-Mo-Au        | Uzbekistan        | 18                 | [21]      |
| Harrachov             | Granite vein Mo          | Czech Republic    | 9                  | [21]      |
| Bohutín               | Granodiorite Mo          | Czech Republic    | 4                  | [21]      |
| Černá hora u Blanska  | Granodiorite Mo          | Czech Republic    | 5                  | [21]      |
| Černá Voda u Vidnavy  | Granodiorite Mo          | Czech Republic    | 6                  | [21]      |
| Derflice              | Granite vein Mo          | Czech Republic    | 5                  | [21]      |
| Hůrky u Nové Bystřice | Granite vein Mo          | Czech Republic    | 6                  | [21]      |
| Fojtka u Liberce      | Granodiorite Mo          | Czech Republic    | 5                  | [21]      |
| Skalsko               | Pegmatite vein Mo        | Czech Republic    | 6                  | [21]      |
| Moldava               | Granite vein Mo          | Czech Republic    | 3                  | [21]      |
| Vrchoslav             | Granite vein Mo          | Czech Republic    | 6                  | [21]      |
| Shapinggou            | Porphyry Mo              | China             | 79                 | [22]      |
| Kalinovskoe           | Porphyry Cu              | South Urals       | 23                 | [23]      |
| Birgilda              | Porphyry Cu              | South Urals       | 36                 | [23]      |
| Sar Cheshmeh          | Porphyry Cu-Mo           | Iran              | 64                 | [24]      |

**Table S2.** Summary of censored LA-ICP-MS trace element data for molybdenite.

| Element           | Al | Si | Fe | Co | Ni | Cu | Zn | Ge | As | Se | Zr | Nb | Mo |
|-------------------|----|----|----|----|----|----|----|----|----|----|----|----|----|
| Censored data (%) | 85 | 90 | 52 | 20 | 25 | 1  | 3  | 88 | 6  | 1  | 46 | 55 | 89 |
| Element           | Ag | Cd | Sn | Sb | Te | W  | Re | Au | Tl | Pb | Bi | U  |    |
| Censored data (%) | 7  | 85 | 30 | 17 | 2  | 0  | 2  | 34 | 58 | 1  | 2  | 87 |    |
